# Supplementary material for: Association between immune-inflammatory indexes and lower urinary tract symptoms: an analysis of cross-sectional data from the US National Health and Nutrition Examination Survey (2005–2008)
Source: HighWire-hosted journal article supplement (doi:10.1136/bmjopen-2023-080826), 2024-03-01
Supplement: bmjopen-2023-080826supp001_data_supplement.pdf [file bmjopen-2023-080826supp001_data_supplement.pdf]

**Supplementary Figure 1.** Study flowchart. Of 20,497 participants in the 2005–2008 National Health and Nutrition Examination Survey (NHANES), 2,709 remained after fulfilling inclusion and exclusion criteria

**Supplementary Figure 2.** Dose-response relationships between blood immune-inflammatory indexes and daytime LUTS (A) PIV and LUTS; (B) SIRI and LUTS; (C) SII and LUTS; (D) NLR and LUTS; (E) dNLR and LUTS; (F) MLR and LUTS; (G) PLR and LUTS; (H) CRP and LUTS. They are adjusted for age, race/ethnicity, education level, smoking status, alcohol use, and BMI, total cholesterol, and a history of diabetes and hypertension. The shaded part represents the 95% CI. Abbreviations: OR, odds ratio; LUTS, lower urinary tract symptoms; PIV, pan-immune-inflammation value; SIRI, system inflammation response index; SII, systemic immune-inflammation index; NLR, neutrophil to lymphocyte ratio; dNLR, derived neutrophil-to-lymphocyte ratio; MLR, monocyte to lymphocyte ratio; PLR, platelet to lymphocyte ratio; CRP, C-reactive protein.

**Supplementary Figure 3.** Dose-response relationships between blood immune-inflammatory indexes and nocturia (A) PIV and LUTS; (B) SIRI and LUTS; (C) SII and LUTS; (D) NLR and LUTS; (E) dNLR and LUTS; (F) MLR and LUTS; (G) PLR and LUTS; (H) CRP and LUTS. They are adjusted for age, race/ethnicity, education level, smoking status, alcohol use, and BMI, total cholesterol, and a history of diabetes and hypertension. The shaded part represents the 95% CI. Abbreviations: OR, odds ratio; LUTS, lower urinary tract symptoms; PIV, pan-immune-inflammation value; SIRI, system inflammation response index; SII, systemic immune-inflammation index; NLR, neutrophil to lymphocyte ratio; dNLR, derived neutrophil-to-lymphocyte ratio; MLR, monocyte to lymphocyte ratio; PLR, platelet to lymphocyte ratio; CRP, C-reactive protein.
