# Supplementary figures and images for: Association between immune-inflammatory indexes and lower urinary tract symptoms: an analysis of cross-sectional data from the US National Health and Nutrition Examination Survey (2005–2008)
Source: HighWire-hosted journal article supplement (doi:10.1136/bmjopen-2023-080826), 2024-03-01

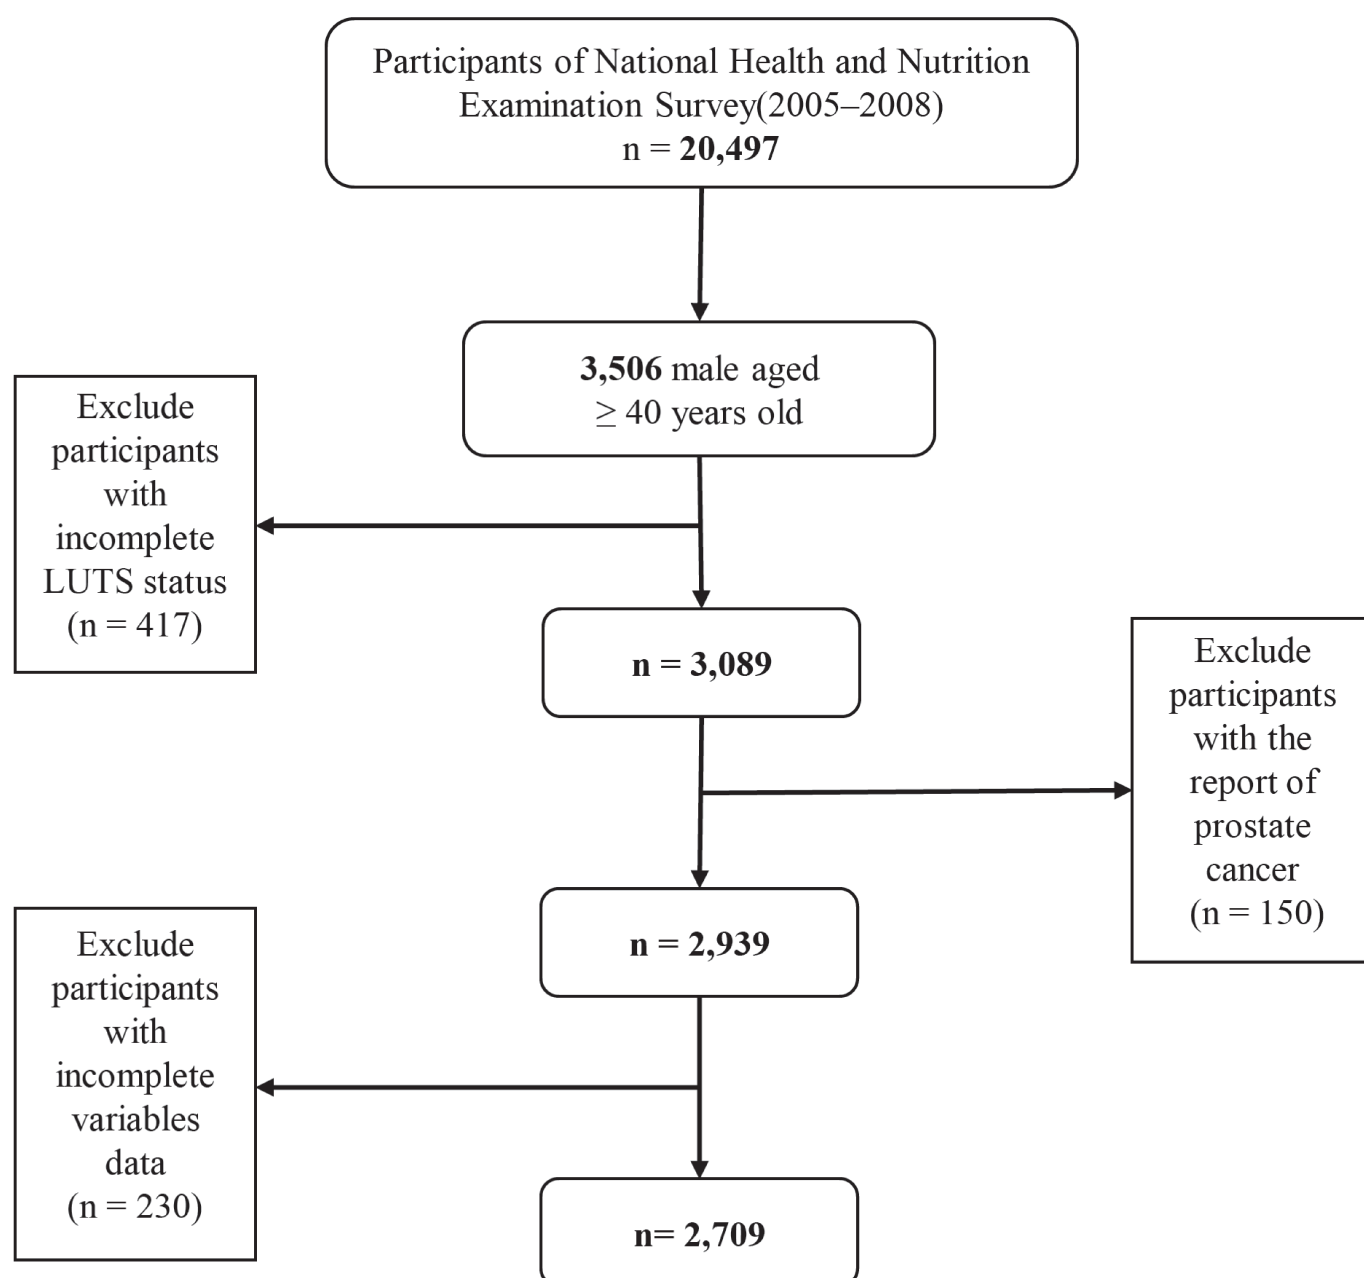

Supplement: bmjopen-2023-080826supp002_data_supplement.pdf [file bmjopen-2023-080826supp002_data_supplement.pdf]
